# Supplementary material for: Effect of arsenic stress on 5-methylcytosine, photosynthetic parameters and nutrient content in arsenic hyperaccumulator Pteris cretica (L.) var. Albo-lineata
Source: PubMed Central journal article supplement (PMC7106808; doi:10.1186/s12870-020-2325-6), 2020-03-30

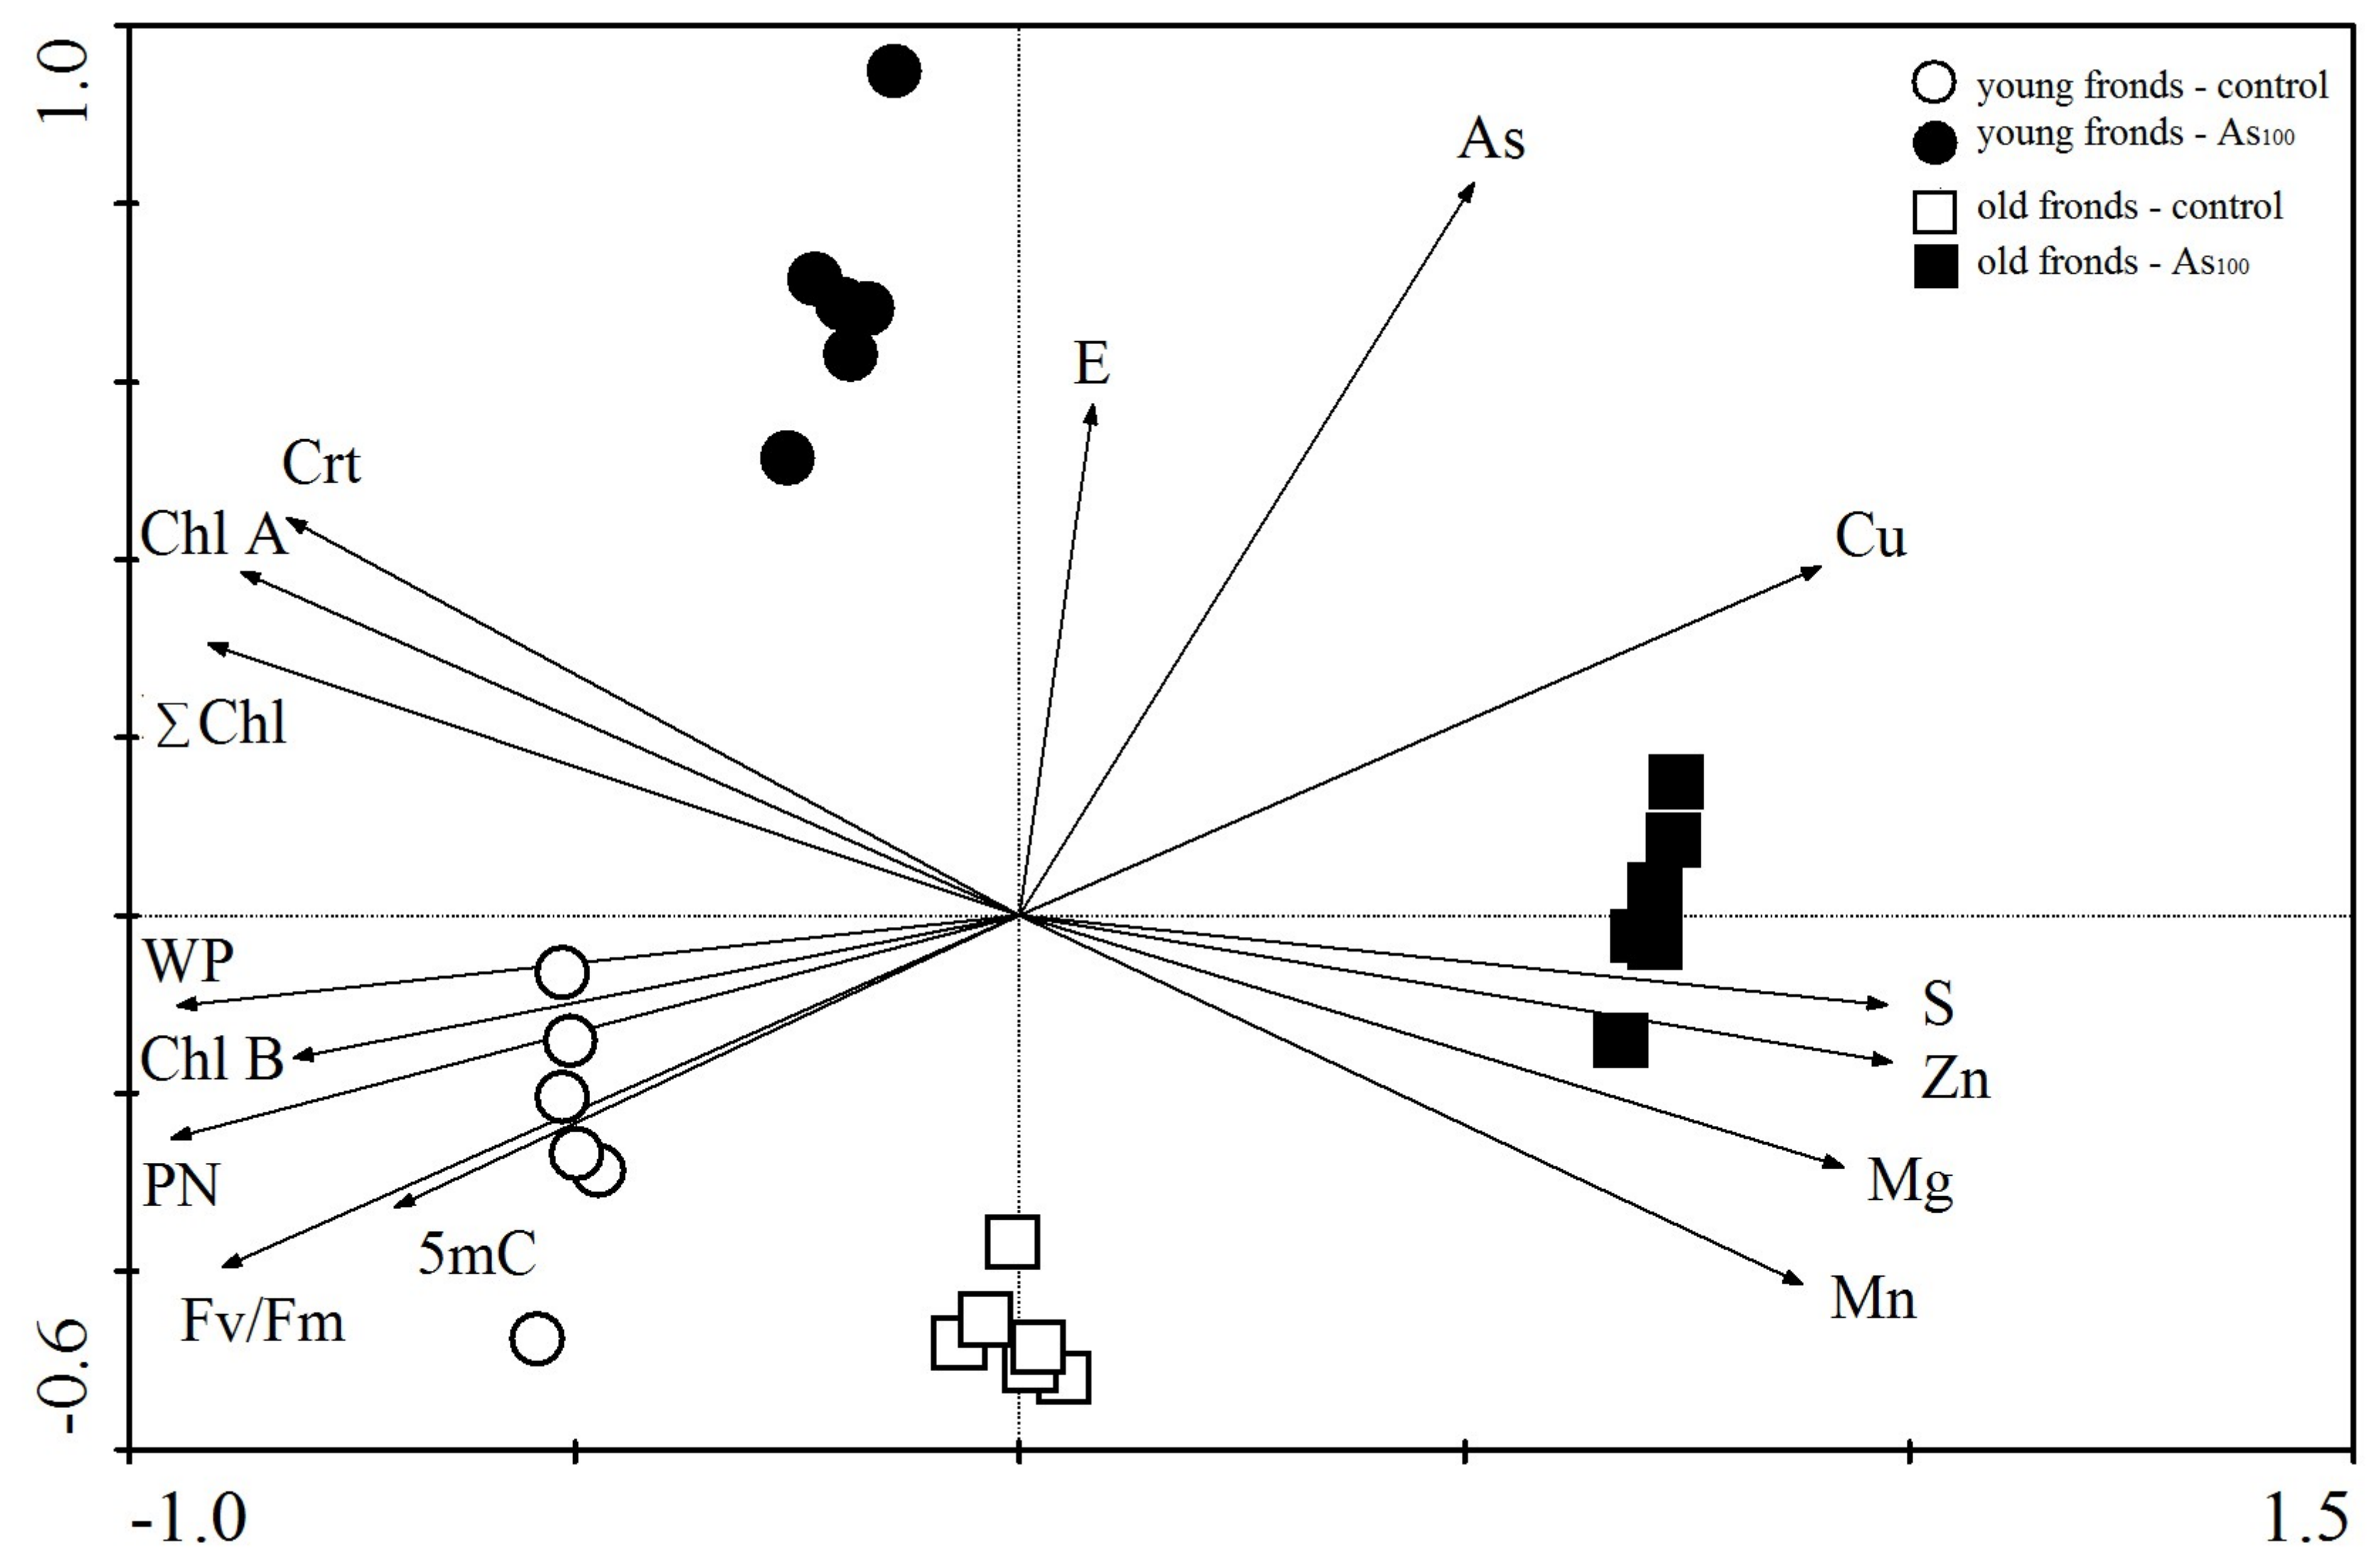

Supplement: 12870_2020_2325_MOESM3_ESM.pdf [file 12870_2020_2325_MOESM3_ESM.pdf]
